# Supplementary material for: The Need for Standardization in Next-Generation Sequencing Studies for Classic Hodgkin Lymphoma: A Systematic Review
Source: MDPI journal article supplement (doi:10.3390/diagnostics12040963), 2022-04-12
Supplement: s1 [file s1]

## Supplementary Material

*Systematic Review*

# The Need for Standardization in Next-Generation Sequencing Studies for Classic Hodgkin Lymphoma.

**Antonio Santisteban-Espejo<sup>1,2,3</sup>, Irene Bernal-Florindo<sup>2,\*</sup>, Jose Perez-Requena<sup>1</sup>, Lidia Atienza-Cuevas<sup>1</sup>, Julia Moran-Sanchez<sup>3,4</sup>, María del Carmen Fernandez-Valle<sup>4</sup>, Raquel Romero-Garcia<sup>2</sup> and Marcial Garcia-Rojo<sup>1,2</sup>**

<sup>1</sup>Department of Pathology, Puerta del Mar University Hospital, 11009 Cadiz, Spain; antoniosantistebanespejo@gmail.com (A.S.E.); jose.perez.sspa@juntadeandalucia.es (J.P.-R.); lidia.atienza.sspa@juntadeandalucia.es (L.A.-C.); marcial.garcia.sspa@juntadeandalucia.es (M.G.-R.)

<sup>2</sup>Institute of Research and Innovation in Biomedical Sciences of the Province of Cadiz (INiBICA), 11009 Cadiz, Spain; raquel.romero.garcia@juntadeandalucia.es

<sup>3</sup>Department of Medicine, Faculty of Medicine, University of Cadiz, 11003 Cadiz, Spain; juliamorsan@gmail.com

<sup>4</sup>Department of Hematology and Hemotherapy, Puerta del Mar University Hospital, 11009 Cadiz, Spain; macafeva@hotmail.com

\* Correspondence: iriberni@hotmail.com

**Supplementary Table S1.** List of genes included in the NGS panels of the documents analyzed in this systematic review.

| Study [reference]   | Genes included in the NGS panel |            |
|---------------------|---------------------------------|------------|
| Trecourt et al. [9] | ARID1A                          | ITPKB      |
|                     | BCL2                            | KLF2       |
|                     | BCOR                            | KMT2D/MLL2 |
|                     | BIRC3                           | MEF2B      |
|                     | BRAF                            | MFHAS1     |
|                     | BTK                             | MYD88      |
|                     | CARD11                          | NOTCH1     |
|                     | CCND1                           | NOTCH2     |
|                     | CD58                            | PIM1       |
|                     | CD79A                           | PLCG2      |
|                     | CD79b                           | PRDM1      |
|                     | CDKN2A                          | PTPRD      |
|                     | CDKN2B                          | RHOA       |
|                     | CIITA                           | SF3B1      |
|                     | CREBBP                          | SOCS1      |
|                     | CXCR4                           | STAT3      |
|                     | EP300                           | STAT6      |
|                     | EZH2                            | TCF3       |
|                     | FBXW7                           | TET2       |
|                     | FOXO1                           | TNFAIP3    |
|                     | GNA13                           | TRAF2      |
|                     | ID3                             | TRAF3      |
|                     | IDH2                            | XPO1       |
|                     | IRF4                            |            |
| Alcoceba et al. [1] | ARID1A                          | KMT2D      |
|                     | ATM                             | LRRN3      |
|                     | B2M                             | MYC        |
|                     | BIRC3                           | NFKBIE     |
|                     | BTG1                            | NFKBI1A    |
|                     | BTK                             | P2RY8      |
|                     | CARD11                          | PCBP1      |
|                     | CD36                            | PIK3CA     |
|                     | CIITA                           | PIM1       |
|                     | CREBBP                          | PTPN1      |
|                     | CSF2RB                          | SOCS1      |
|                     | CXCR4                           | SPEN       |
|                     | EP300                           | STAT6      |
|                     | EZH2                            | TBL1XR1    |
|                     | FBXW7                           | TNFAIP3    |
|                     | GNA13                           | TNFRSF14   |
|                     | HIST1H1C                        | TP53       |
|                     | HIST1H1E                        | XPO1       |
|                     | IIGLL5                          | ZMYM3      |
| IKBKB               | MYD88                           |            |
| ITPKB               | CCND3                           |            |
| Camus et al. [6]    | NFKBIE                          |            |

|  |         |          |
|--|---------|----------|
|  |         | ITPKB    |
|  |         | PTPN1    |
|  |         | TNFAIP3  |
|  |         | SOCS1    |
|  |         | STAT6    |
|  |         | B2M      |
|  |         | XPO1     |
|  |         | GNA13    |
|  |         |          |
|  | ABL1    | MYC      |
|  | B2M     | NFKBIA   |
|  | BCL10   | NFKBIE   |
|  | BTK     | NOTCH1   |
|  | CARD11  | NUMA1    |
|  | CASP8   | PIK3CD   |
|  | CD19    | PTPN1    |
|  | CD38    | REL      |
|  | CREBBP  | RET      |
|  | CSF1R   | SH3BP5   |
|  | CSF2    | SMARCA4  |
|  | CSF2RB  | SOCS1    |
|  | CYLD    | STAT3    |
|  | EP300   | STAT6    |
|  | FAS     | TNFAIP3  |
|  | IL32    | TP53     |
|  | LCP1    | TRAF3    |
|  | MYB     |          |
|  |         |          |
|  | ABL1    | ATRX     |
|  | BRIP1   | CDK12    |
|  | CHEK2   | DNMT3A   |
|  | FANCA   | FGF3     |
|  | GNAQ    | IRF4     |
|  | MAP2K1  | MPL      |
|  | NFKBIA  | PARP1    |
|  | PPP2R1A | RARA     |
|  | SMARCD1 | TNFAIP3  |
|  | AKT1    | AURKA    |
|  | BTG1    | CDK4 D   |
|  | CHUK    | OT1L     |
|  | FANCC   | FGF4     |
|  | GNAS    | IRS2     |
|  | MAP2K2  | MRE11A   |
|  | NKX2-1  | PARP2    |
|  | PRDM1   | RB1      |
|  | SMO     | TNFRSF14 |
|  | AKT2    | AURKB    |
|  | BTK     | CDK6     |
|  | CIC     | EGFR     |
|  | FANCD2  | FGF6     |
|  | GPR124  | JAK1     |
|  | MAP2K4  | MSH2     |
|  | NOTCH1  | PARP3    |

---

|          |        |
|----------|--------|
| PRKAR1A  | REL    |
| SOCS1    | TOP1   |
| AKT3     | AXL    |
| C17orf39 | CDK8   |
| CRBN     | EMSY   |
| FANCE    | FGF7   |
| GSK3B    | JAK2   |
| MAP3K1   | MSH6   |
| NOTCH2   | PARP4  |
| PRKDC    | RET    |
| SOX10    | TP53   |
| ALK      | BACH1  |
| CARD11   | GRIN2A |
| CREBBP   | EP300  |
| FANCF    | FGFR1  |
| HGF      | JAK3   |
| MAP3K13  | MTOR   |
| NOTCH3   | PAX5   |
| PRSS8    | RICTOR |
| SOX2     | TRRAP  |
| ALOX12B  | BAP1   |
| CASP8    | SPOP   |
| CRKL     | EPHA3  |
| FANCG    | FGFR2  |
| HLA-A    | JUN    |
| MCL1     | MUTYH  |
| NOTCH4   | PDGFRA |
| PTCH1    | RNF43  |
| SPEN     | TSC1   |
| APC      | BARD1  |
| CBFB     | SETD2  |
| CRLF2    | EPHA5  |
| FANCI    | FGFR3  |
| HRAS     | KDM5A  |
| MDM2     | MYC    |
| NPM1     | PDGFRB |
| PTEN     | RPA1   |
| SRC      | TSC2   |
| APCDD1   | BCL2   |
| CBL      | PBRM1  |
| CSF1R    | EPHB1  |
| FANCL    | FGFR4  |
| IDH1     | KDM5C  |
| MDM4     | MYCL1  |
| NRAS     | PKD1   |
| PTPN11   | RPTOR  |
| STAG2    | TSHR   |
| AR       | BCL2L2 |
| CCND1    | FOXL2  |
| CTCF     | ERBB2  |
| FANCM    | FLT1   |

---

---

|         |         |
|---------|---------|
| IDH2    | KDM6A   |
| MED12   | MYCN    |
| NSD1    | PIK3C2G |
| RAD50   | RUNX1   |
| STAT4   | VHL     |
| ARAF    | BCL6    |
| CCND2   | CTNNA1  |
| CTNNB1  | ERBB3   |
| FAT3    | FLT3    |
| IGF1    | KDR     |
| MEF2B   | MYD88   |
| NTRK1   | PIK3C3  |
| RAD51   | RUNX1T1 |
| STK11   | WISP3   |
| ARFRP1  | BCOR    |
| CCND3   | CDKN1B  |
| CUL4A   | ERBB4   |
| FBXW7   | FLT4    |
| IGF1R   | KEAP1   |
| MEN1    | MYST3   |
| NTRK2   | PIK3CA  |
| RAD51B  | SF3B1   |
| SUFU    | WT1     |
| ARID1A  | BCORL1  |
| CCNE1   | CDKN2A  |
| CUL4B   | ERG     |
| FGF10   | GATA1   |
| IGF2    | KIT     |
| MET     | NBN     |
| NTRK3   | PIK3CG  |
| RAD51C  | SH2B3   |
| SYK     | XPO1    |
| ARID2   | BLM     |
| CD79A   | CDKN2B  |
| CYP17A1 | ESR1    |
| FGF12   | GATA2   |
| IKBKE   | KLHL6   |
| MITF    | NCOR1   |
| NUP93   | PIK3R1  |
| RAD51D  | SMAD2   |
| TBX3    | XRCC3   |
| ASXL1   | BRAF    |
| CD79B   | CDKN2C  |
| DAXX    | EZH2    |
| FGF14   | GATA3   |
| IKZF1   | KRAS    |
| MLH1    | NF1     |
| PAK3    | PIK3R2  |
| RAD52   | SMAD4   |
| TET2    | ZNF217  |
| ATM     | BRCA1   |

---

|                  |          |               |
|------------------|----------|---------------|
| Desch et al. [7] | CDC73    | CEBPA         |
|                  | DDR2     | FAM123B (WTX) |
|                  | FGF19    | GNA11         |
|                  | IL7R     | LMO1          |
|                  | MLL      | NF2           |
|                  | PAK7     | PMS2          |
|                  | RAD54L   | SMARCA4       |
|                  | TGFBR2   | ZNF703        |
|                  | ATR      | BRCA2         |
|                  | CDH1     | CHEK1         |
|                  | DIS3     | FAM46C        |
|                  | FGF23    | GNA13         |
|                  | INHBA    | LRP1B         |
|                  | MLL2     | NFE2L2        |
|                  | PALB2    | PNRC1         |
|                  | RAF1     | SMARCB1       |
|                  | TIPARP   |               |
|                  | ACTG1    | MEF2B         |
|                  | CSF2RB   | MYC           |
|                  | ARID1A   | NCOR2         |
|                  | FOXO1    | NSD2          |
|                  | ATM      | PIM1          |
|                  | IGLL5    | POT1          |
|                  | ATP6AP1  | POU2F2        |
|                  | ITPR3    | PRDM1         |
|                  | ATP6V1B2 | PTEN          |
|                  | MYB      | PTPN11        |
|                  | B2M      | RB1           |
|                  | NFKBIA   | S1PR2         |
|                  | BCL2     | SALL3         |
|                  | NFKBIE   | SAMHD1        |
|                  | BCL6     | SGK1          |
|                  | NUP214   | SMARCA4       |
|                  | BIRC3    | SOCS1         |
|                  | PTPN1    | SPEN          |
|                  | BTG1     | TBL1XR1       |
|                  | TET2     | TCF3          |
|                  | CARD11   | TMEM30A       |
|                  | CCND1    | TNF           |
|                  | CCND3    | TNFAIP3       |
|                  | CCT6B    | TNFRSF14      |
|                  | CD58     | TP53          |
|                  | CD70     | TRAF3         |
|                  | CD83     | BRAF          |
|                  | CDH2     | BTK           |
|                  | CDK4     | CD79B         |
|                  | CDKN2A   | CXCR4         |
|                  | CREBBP   | IDH1          |
|                  | CYLD     | PLCG2         |
|                  | DDX3X    | KRAS          |
|                  | DIS3     | CIITA         |

|                  |          |                    |
|------------------|----------|--------------------|
| Spina et al. [8] | DUSP2    | MYD88              |
|                  | EP300    | NOTCH1             |
|                  | ETS1     | NRAS               |
|                  | EXOSC1   | SF3B1              |
|                  | EZH2     | STAT6              |
|                  | EZR      | XPO1               |
|                  | FAM46C   | <b>Genomic</b>     |
|                  | FBXW7    | <b>regions for</b> |
|                  | FGFR3    | <b>structural</b>  |
|                  | GNA13    | <b>variants</b>    |
|                  | HIST1H1E | BCL1-MTC all       |
|                  | HIST1H1C | IgH-VH             |
|                  | HIST1H1D | BCL2-3MBR          |
|                  | HIST1H3B | BCL2-5mcr          |
|                  | HLA-A    | BCL2-MBR           |
|                  | ID3      | BCL2-mcr           |
|                  | INTS12   | BCL6-5'UTR         |
|                  | IRF4     | CD274              |
|                  | IRF8     | CPA5               |
|                  | ITPKB    | IRF5               |
|                  | KLF2     | all IgH-DH         |
|                  | KLHL6    | all IgH-JH         |
|                  | KMT2C    | all IgH-switch     |
|                  | KMT2D    | regions            |
|                  | LTB      | all IgK-JK         |
|                  | MAP2K1   | all IgL-JL         |
|                  | MED12    | LEP                |
|                  |          | MIR15A             |
|                  |          | MIR16-1            |
|                  |          | REL                |
|                  |          | MYC                |
|                  | ARID1A   | KLF2               |
|                  | ATM      | KLHL6              |
|                  | B2M      | KMT2D              |
|                  | BCL2     | KRAS               |
|                  | BCL6     | MAP2K1             |
|                  | BCOR     | MAP3K14            |
|                  | BIRC3    | MEF2B              |
|                  | BRAF     | MYC                |
|                  | BTG      | MYD88              |
|                  | BTK      | NFKBIE             |
|                  | CARD11   | NOTCH1_3'UTR       |
|                  | CCND1    | NOTCH1_EX34        |
|                  | CCND2    | NOTCH2_EX34        |
|                  | CCND3    | NRAS               |
|                  | CD36     | P2RY8              |
|                  | CD58     | PCBP1              |
|                  | CD70     | PIK3CA             |
|                  | CD79A    | PIM1               |
|                  | CD79B    | PLCG2              |
|                  | CIITA    | POT1               |

|                 |          |          |
|-----------------|----------|----------|
| Mata et al. [5] | CREBBP   | PRDM1    |
|                 | CXCR4    | RIPK1    |
|                 | EGR2     | RRAGC    |
|                 | EP300    | S1PR2    |
|                 | EZH2     | SIN3A    |
|                 | FBXO11   | SPEN     |
|                 | FBXW7    | STAT3    |
|                 | FGFR2    | STAT6    |
|                 | FOXO1    | TBL1XR1  |
|                 | GNA13    | TCF3     |
|                 | HIST1H1C | TET2     |
|                 | HIST1H1E | TNFAIP3  |
|                 | HIST1H3B | TNFRSF14 |
|                 | ID3      | TP53     |
|                 | IKBKB    | TRAF2    |
|                 | IRAK1    | TRAF3    |
|                 | IRF4     | WHSC1    |
|                 | IRF8     | XPO1     |
|                 | ITPKB    | ZMYM3    |
|                 | B2M      | TNFRSF14 |
|                 | CARD11   | CSF2RB   |
|                 | CASP8    | FAS      |
|                 | CSF1R    | LCP1     |
|                 | BCL10    | LTB      |
|                 | NFKBIA   | MAPK3    |
|                 | STAT6    | MDM2     |
|                 | BTK      | NUMA1    |
|                 | IL32     | PLCG2    |
|                 | MYB      | SMARCA4  |
|                 | SH3BP5   | NOTCH1   |
|                 | ABL1     | CREBBP   |
|                 | ADAM8    | EP300    |
|                 | CD19     | STAT3    |
|                 | CD38     | MYC      |
|                 | NFKB2    | EZH2     |
|                 | PIK3CD   | MYD88    |
|                 | RET      |          |

**Supplementary Table S2.** Proposal of NGS panel for classic Hodgkin lymphoma.

| Gene    | Chromosome | Number of Amplicons | Total bases | Covered bases | Missed bases | Coverage |
|---------|------------|---------------------|-------------|---------------|--------------|----------|
| ID3     | Chr1       | 5                   | 400         | 400           | 0            | 1.000    |
| ARID1A  | Chr1       | 87                  | 7258        | 7187          | 71           | 0.969    |
| BCL10   | Chr1       | 10                  | 762         | 762           | 0            | 1.000    |
| NOTCH2  | Chr1       | 102                 | 8149        | 7958          | 191          | 0.731    |
| XPO1    | Chr2       | 51                  | 3696        | 3674          | 22           | 0.916    |
| CXCR4   | Chr2       | 13                  | 1126        | 1126          | 0            | 1.000    |
| SF3B1   | Chr2       | 68                  | 4505        | 4478          | 27           | 0.961    |
| CASP8   | Chr2       | 24                  | 1913        | 1889          | 24           | 0.984    |
| MYD88   | Chr3       | 14                  | 1054        | 1054          | 0            | 1.000    |
| CD38    | Chr4       | 15                  | 1063        | 1063          | 0            | 1.000    |
| CSF2    | Chr5       | 9                   | 515         | 515           | 0            | 1.000    |
| CSF1R   | Chr5       | 51                  | 3339        | 3339          | 0            | 1.000    |
| NFKBIE  | Chr6       | 21                  | 1623        | 1623          | 0            | 1.000    |
| MYB     | Chr6       | 38                  | 2606        | 2596          | 10           | 0.984    |
| TNFAIP3 | Chr6       | 26                  | 2533        | 2515          | 18           | 0.990    |
| CARD11  | Chr7       | 54                  | 3945        | 3945          | 0            | 1.000    |
| BRAF    | Chr7       | 42                  | 2661        | 2655          | 6            | 0.997    |
| EZH2    | Chr7       | 40                  | 2636        | 2636          | 0            | 1.000    |
| MYC     | Chr8       | 15                  | 1425        | 1425          | 0            | 1.000    |
| PTPRD   | Chr9       | 84                  | 6539        | 6516          | 23           | 0.996    |
| CDKN2A  | Chr9       | 11                  | 1012        | 1008          | 4            | 0.996    |
| ABL1    | Chr9       | 45                  | 3769        | 3759          | 10           | 0.991    |
| NOTCH1  | Chr9       | 111                 | 8348        | 8274          | 74           | 0.973    |
| TRAF2   | Chr9       | 21                  | 1706        | 1706          | 0            | 1.000    |
| FAS     | Chr10      | 17                  | 1188        | 1188          | 0            | 1.000    |
| CCND1   | Chr11      | 14                  | 988         | 988           | 0            | 1.000    |
| BIRC3   | Chr11      | 28                  | 1975        | 1971          | 4            | 0.997    |
| STAT6   | Chr12      | 42                  | 2964        | 2955          | 9            | 0.996    |
| FOXO1   | Chr13      | 19                  | 2608        | 1929          | 79           | 0.939    |
| LCP1    | Chr13      | 30                  | 2184        | 2184          | 0            | 1.000    |
| NFKBIA  | Chr14      | 16                  | 1074        | 1074          | 0            | 1.000    |
| B2M     | Chr15      | 7                   | 420         | 420           | 0            | 1.000    |
| IL32    | Chr16      | 9                   | 805         | 605           | 200          | 0.896    |
| CREBBP  | Chr16      | 95                  | 7949        | 7926          | 23           | 0.995    |
| CD19    | Chr16      | 32                  | 1954        | 1954          | 0            | 1.000    |
| CYLD    | Chr16      | 43                  | 3211        | 3144          | 67           | 0.978    |
| PLCG2   | Chr16      | 62                  | 4438        | 4438          | 0            | 1.000    |
| TP53    | Chr17      | 24                  | 1503        | 1503          | 0            | 1.000    |
| CD79B   | Chr17      | 12                  | 813         | 813           | 0            | 1.000    |
| BCL2    | Chr18      | 9                   | 793         | 793           | 0            | 1.000    |
| TCF3    | Chr19      | 35                  | 2572        | 2567          | 5            | 0.997    |
| KLF2    | Chr19      | 12                  | 1128        | 968           | 160          | 0.936    |
| Gene    | Chromosome | Amplicons           | Total bases | Covered bases | Missed bases | Coverage |

|        |       |    |      |      |   |       |
|--------|-------|----|------|------|---|-------|
| MEF2B  | Chr19 | 16 | 1267 | 1267 | 0 | 1.000 |
| CD79A  | Chr19 | 12 | 781  | 781  | 0 | 1.000 |
| CSF2RB | Chr22 | 38 | 2954 | 2954 | 0 | 1.000 |
| EP300  | Chr22 | 97 | 7865 | 7865 | 0 | 1.000 |
| BTK    | ChrX  | 33 | 2462 | 2402 | 0 | 1.000 |
